# Supplementary material for: Seeds for effective oligonucleotide design
Source: Springer Nature journal article supplement (doi:10.1186/1471-2164-12-280), 2011-06-01
Supplement: Additional file 1 [file 1471-2164-12-280-s1.pdf]

**N=50, k=2**

---

w=7

1101010111  
11100001001011

w=8

111001101011  
11101000010001011

w=9

1110110100111  
111010000100010111

w=10

1111011010111  
111010001001001111

w=11

111010110110111  
1111010010001010111

w=12

1110101101101111  
1111010001001000110111

w=13

1111011011101111  
1111011000010100110111

w=14

11110110011010101111  
11110101000001000010011001111

w=15

11110110011101011111  
111011010000110010010101111

w=16

111011011011101011111  
11101101100001010010001110111

w=17

11111011011100110101111  
11111100010100100110010101111

w=18

111101110011011010111111  
111101010001001101000110011111

w=19

111101101110101111011111  
111101010011010001100011011111

w=20

111110111011110110111111  
11110110100011000101001101011111

---

**N=50, k=4**

---

w=7

1101010111  
1110001001011  
1101001000100011  
110010001000001011

w=8

11011001111  
11100010101011  
11010010000100111  
110101000000100001011

w=9

110110101111  
1110100010010111  
11101001000010001011  
11100010001000010001011

w=10

111001011010111  
110111000111011  
1110101000100100111  
111010010000000100010111

w=11

111011011010111  
11101001010001001111  
11010100011100011011  
1111001000000100100010111

w=12

111101101110111  
1111000101011001111  
11101001001000100101111  
11101001000010100010100111

w=13

1111011101101111  
11110100101011001111  
1110101001100001110111  
11110010100010001000101111

w=14

11110110111011111  
111011100010100100101111  
1111000101100010001000101111  
1110101001001000100100010100111

w=15

111111011011101111  
1110111000011010010110111  
11110010010100100010100011111  
11110001010001000100001100101111

w=16

11111101110101101111  
11110101100110010001011111  
11101100100001010100111001111  
11110100001100001001001001110111

w=17

111110111011101101111  
1111010010110010100011101111  
1111010111000000110010010110111  
1111100100001100010010101000101111

w=18

1111110111101011101111  
1110110100110101001100111111  
1110111010000111001001011100111  
1111100101001100000100010100111111

w=19

1111011101110111101111  
11111101101001110001010110111  
11110101011001000101100011011111  
11110110001000101101000101100101111

w=20

11111101111101111011111  
11110110011101000110110111111  
11110111010010011011000101011111  
11111100101011010010000110010101111

---

**N=50, k=8**

---

w=7

110110111  
1110001001011  
101010100000111  
1110010000100011  
11010000001010011  
11001001000100011  
11000010010001011  
10100101000001011

w=8

1110110111  
11100010010111  
1100101000101011  
10110010010001011  
110100001001000111  
110001010000100111  
110101000010010011  
111001000100001101

w=9

11110110111  
1011000101001111  
1101001000010101011  
11010100010100100011  
111100001000100010101  
110010010000010100111  
110001100100000011011  
110010001010001001011

w=10

111011101111  
11110001010010111  
11101000100011000111  
110101001001000101011  
1101100100010100001101  
1101100011000010010011  
1101011000001100100101  
1110000100100001010111

w=11

1111011101111  
111101010000011001011  
1010101100001001000010111  
111001000100100010100100101  
1110100001010000000100110011  
11001001000001010000010010111  
10100110000100010010000001111  
11010000110001000010001010011

w=12

11111011101111  
1110010110000100110111  
11110001001000100001101011  
1101000110100000101001100011  
11010010100010000100010011101  
101011000100010100010000011011  
111100100001000010100001010011  
111001000000101000100100001111

w=13

111101110111111  
11101011000100100101111  
111100001010001011000010111  
11011010010000100001010100111  
111010001000011000101001010011  
1101010001000100101000001001111  
1110100100010000100100011001011  
1100110000101000100000110110011

w=14

1111101111011111  
11101101010100001101111  
111100001100010010101011011  
11101100100010011000010010111  
111100010011000011000010101011  
110011100010010000100110101011  
111010010000101000110100010111  
111010010010010100001001100111

w=15

11111011110111111  
111011100100100101011111  
1111010010001000110100110111  
111010010001001100011001001111  
1111001001010001010001000111011  
1110101000101100000100111000111  
1110100111000010011000101001011  
1100111000010100101010000101111

w=16

11111011101101011111  
11110101001110001011001111  
11111010010001101000010110111  
1101100111000001001100111001011  
11101001011001000100101000110111  
11011010000110100010100010011111  
11101011001000001010010101100111  
11100110010101100001000101010111

w=17

1111011101110110111111  
1111011010001100101010101111  
11110010011000010100101101010111  
1101010011100000011001100010110111  
11011011000010101001000011000110111  
11100111001001001000011001001010111  
11101010000110011010000001111001011  
11111001010001100000101010001001111

w=18

11111110111110111111  
111110100110011010011101111  
1110111010100100010101100011111  
111110000101101100000110101001111  
1110101110010001100010010010110111  
1101101000111000010010111001010111  
1101101011000010101100001001101111  
1111001100010100011101000110010111

w=19

1111111011111011101111  
1111011001110100101010111111  
1110111010011100010011001011111  
111010100101101010100011100011111  
1111011000100010110111000010110111  
1111101010011001011000010101100111  
1111000111100001001001011010111011  
1101100110101100000011100110101111

w=20

111111011111011101111111  
11110101011011001100111101111  
11110111100010100101110010110111  
1111011100010000101100111011001111  
11101101001010111000011010010110111  
11111000110010111010000011101010111  
11110011011000010111010100001110111  
11101100101111000010100100110101111

---

**N=50, k=16**

---

w=7

110101111  
11100000110101  
10110010000100101  
11100001001000101  
110010100000010011  
110001000001001101  
110100000100010011  
101010000001100011  
1100010010000000111  
1001001000100001011  
1100100010000011001  
1100100001100000101  
1010000010100100011  
1101001000001010001  
1010000100001010011  
1010000100010001101

w=8

1110110111  
111010001000111  
101001100010001011  
101010000001100111  
1100100100010010101  
1011000001001010011  
1110010000010101001  
1101000010010000111  
11000100001101000101  
10110000100100100011  
11000100010000101011  
11001001000000110101  
11010000110000010011  
10010100001010001011  
10100011000010010011  
11000010101000001011

w=9

1111011111  
110110100001111  
111000100101001011  
110101000110000111  
1011100000100110011  
1110001010000101011  
1101100010100010101  
1110010000110010101  
11001001001010001101  
11001010010000100111  
10101001000100011011  
11010011000010001011  
11100100100010100011  
11010000110000010111  
10101000010011010011  
11000110010001001011

w=10

111101101111  
11011100100001111  
1101100100011001011  
1111000010011010101  
11100010110000011011  
10110011000010100111  
11101000001100111001  
11000110001010010111  
111001010000011100011  
110101001010001001011  
111000101010010001101  
111010001001001001011  
110010100100010101011  
101011100001100010011  
101101010001000100111  
110100100101000010111

w=11

1111011101111  
110101100001000101111  
1110010001000011010010101  
101001101000000110010010011  
1010110000000011001010010011  
1110000011001000001000110011  
1010010101000100010000001111  
1100101000010001010000010111  
11001001010001000010100001101  
11000100100100010000100011011  
11100001010000100001010001011  
10010100001100000010011000111  
11011000010010000100010010011  
11011001000001001000001100011  
10111000000110000010000101101  
11100010000101100000001010101

w=12

111110101101111  
11100110000010100110111  
111100001001000110000100111  
10101001101000000100011001011  
110101100000011001000100001101  
111001000010010000110000011011  
110011000010100010000101000111  
110001011001001000001000010111  
1101001010100000100100100000111  
1101100001000101000000010100111  
1101010001001000000110001010101  
1101000100010101001000001001011  
1110100100000000010101001010011  
1101000100101000010001100100011  
1100010101000010100100010001011  
1011010000011000000100110100011

w=13

111111011101111  
110111001001000011010111  
1101001101000000110001010111  
110100101100000000101110000111  
1010110000010010001100001010111  
1110010000101010001001000101101  
1110101000010100011001000100011  
1111000100000101001010010010011  
11010000101011000000010100110011  
11100011000100010100100000011011  
11101000101000010001000011001011  
10100110010000110000010100100111  
11001010000100101000100100001111  
11011000011000001100001000100111  
10110110000001100100000011010101  
11000101010001000101000101001011

w=14

1111101111011111  
1101111000101000100111111  
1110110001001010001100010111  
110101001100001010010010010111  
1011001011000000001110101000111  
1010110000110100000001110100111  
1110000110100100100010001100111  
1110101000001010011001001001011  
11100101001000110000100100010111  
11101001000110001010000100101011  
10111010001001000110000001101101  
11000110010101000010100001110011  
11011001000010011000101010000111  
11100100100010100100101000101011  
110110001010001000100000110011011  
11110000011001001001010010100011

w=15

111110110111101111  
11101110001100010010011111  
111011001000100010101101001011  
11001110010001100100100001011011  
110110100100001010100100110000111  
110101001101000000110001010110011  
111010001001001100001001101000111  
101101000110100000101010011001011  
1110100100000100110011000001010111  
1010011100001010000101010001001111  
1011100010110001001001000001100111  
1110010010010110000110000100110011  
1111000101000101000100011000101011  
1101011000010010110000001010010111  
1100101010100001010000110000111011  
1101000100111000000001101010011011

w=16

111111101111011111  
11101111000101001001110111  
111100101100000010101110100111  
11110001001100101000010011011011  
110110001010100011011000000111011  
111110010100100000110010101000111  
110101100010001010010011001001111  
110011010010001101000100101001111  
1110100001100110101000100010100111  
1101010101010001000001110000110111  
1100110100001010110000010101101011  
1111001010000011000100011100101011  
1101001100100100011001000011101011  
1101010010111000001010001011001011  
1110001100101001001011000100010111  
1101010110000110001010100100011101

w=17

1111111101111011111  
111100111001001100110101111  
1111110010000110001001110101011  
11101001100100011110000100101111  
111001010101010110001010000110111  
110101100100110000010100011111011  
111010111010000010100110010110011  
111100000111001010100001011100111  
1111000101100100000101011001011011  
1101100011001010011010100011001011  
1110101010010100010011010011000111  
1101100110001101001000011100100111  
1110011000110000011101000100111011  
1110100101001010010110010100010111  
1110110000011010100001101000011111  
1101011010010011001010000101010111

w=18

111111011101111011111  
1111011010011101000101011111  
11101010101101100000101001101111  
111101000111000100011010010110111  
1100111001001000101100100111010111  
1111010010101000110011000101011011  
1110010110000100101100011100110111  
1110111000100010110001101000111011  
11011100101100000111000100110100111  
11011101000001111001000010110011011  
11001011001101010000110011010100111  
1110100110000111010101100000101111  
11101000011011000100100111000011111  
11110011010000100001011110011000111  
11110100110010000101010100101011011  
11100101011010010110000010011101011

w=19

11111011011111011101111  
11110110011011000110101011111  
11110111001101010001001011010111  
111010101100001110110110001001111  
1110110010010111100010101100100111  
1101101100100001111100001100111011  
1101010111001010001100100111100111  
1101100011111001010010001010011111  
11101011010001100110101100000011111  
11110100101010110000101100001111011  
11101100111000000101011011001011011  
11110011010100001100011001011101011  
11011110000100101001001110110101011  
11110010100111100010000011010110111  
11010101100101000001110101110010111  
11110101010001001011100010101100111

w=20

11111111011111110111111  
11110111100011100101010111111  
11101110010011101101001001011111  
111001011111001001000111100110111  
1101110011100010001101011011010111  
1110110100001101000111110010110111  
1011111000101011001011001110001111  
1110110011010111100000010110101111  
11100101011000111011001101000111011  
11011100001101110101010100001110111  
11011011010010011011100100011100111  
11101010110110000110000110111011011  
11101101100101010100100011010101111  
11111001101000010010111000111011011  
11110011010101001100111010001001111  
11101010110110000101011001100101111

---

**N=70, k=2**

---

w=7

1101010111  
11100001001011

w=8

111001010111  
11010100000010010011

w=9

1110110010111  
1101001010000001000111

w=10

111010010110111  
11010010001000101000111

w=11

1110110101001111  
110100110010000001010111

w=12

1110100101011001111  
1111010001000101000011011

w=13

111101011001101111  
1110101001001000000110100111

w=14

11110110011010101111  
11110101000001000010011001111

w=15

11110110011101011111  
111011010000110010010101111

w=16

1111001110110101011111  
1111100101000001100010010110111

w=17

1111100110011010101101111  
11110100101000100011000001011001111

w=18

1111100110110101011101111  
11101110010010100011010010011111

w=19

11111011100101110101101111  
111011011010010000101010000110011111

w=20

111110101110110110011101111  
1111011100100010100100001010110011111

---

**N=70, k=4**

---

w=7

11101010011  
101001001000111  
11001000010100011  
11010001000001011

w=8

1110110111  
1101010001001101  
1100101000010001011  
1100010000010010000111

w=9

1110110100111  
111000100101001011  
110010100000100010111  
11100100010000010010011

w=10

11101101010111  
1111001001000100111  
110101000001011001011  
11010001100001000010111

w=11

1111001101010111  
1110101000011000011011  
1101001001000100010001111  
110110001000000010100101011

w=12

11110110011010111  
11101000100100101001111  
11101010010000100100010111  
11100100001010000001000101111

w=13

1111011101101111  
11110110001001001010111  
111010010100000110100011011  
111010000010101000100001100111

w=14

11110110111011111  
111011100010100100101111  
1111000101100010001000101111  
1110101001001000100100010100111

w=15

1111011101011011111  
111010101100010010001101111  
1110100011001010000100100110111  
1111011000100000100100001100010111

w=16

111101110111011011111  
1110111100001010010011010111  
11110100100010101000100110001111  
11110010011000010000101100010010111

w=17

111110110101110111111  
11101110100011001000101101111  
111100110001010010000110101001111  
1111010001001001010000100010011001111

w=18

11110111011110110111111  
1111010110010101001000110011111  
111011000101100000110001010001101111  
1111001011000100010000100110000011010111

w=19

111110011100110101011011111  
1111010100110100100110001100101111  
1111010110000001011001000101110100111  
1111100101001100100001010000100010101111

w=20

111110011101011010111011111  
11110110010001010111000001110110111  
111101010110010100001001100010001101111  
1111101001010001000010010000011100001101111

---

**N=70, k=8**

---

w=7

111101011  
110100000100111  
110000010001001101  
10010001000001010011  
10101000010000100011  
101000010001001000011  
110010000000100001011  
110000010010000010101

w=8

1110101111  
11001100000101101  
110100000010001000111  
11000100001000010010011  
101010000010000010011001  
110001000100100000001011  
110100001001000001000011  
110100000100010010000101

w=9

11101101111  
110110000010100111  
1100100001010000010111  
110101000001000010001011  
1100100010000100101000101  
1100001001000100000110011  
1101000010100010000001011  
1110000100010000100100011

w=10

111101101111  
1101001000101100111  
11101000100001001010011  
1110100001001001000100011  
11000101000100001010000111  
10110000010010000100010111  
11100010001000100000110101  
11001001000010100000101011

w=11

1111011101111  
110011010000100101111  
1101001000100010101000111  
110110000101000010001010011  
1110000101001000000100110011  
1100110010000100010000101101  
1110001000010010010010001011  
1010100010000011001000010111

w=12

11111011101111  
1110010110000100110111  
11110001001000100001101011  
1101000110100000101001100011  
11010010100010000100010011101  
101011000100010100010000011011  
111100100001000010100001010011  
111001000000101000100100001111

w=13

111101110111111  
11101011000100100101111  
111100001010001011000010111  
11011010010000100001010100111  
111010001000011000101001010011  
1101010001000100101000001001111  
1110100100010000100100011001011  
1100110000101000100000110110011

w=14

11110111011011111  
11101100010101001101111  
11110101001001000101100111  
1101100011000010010101010111  
11010101001100000010110001111  
11100110100010001100100001111  
11010011000011100001000110111  
11110010010100010100001011011

w=15

11111011110111111  
1111101000100101001110111  
11011001010100100110100010111  
1101001100011000101000100101111  
11100101001001100010001001101011  
111110000101000001000011010011011  
111001100000110100001101000010111  
111010101100000010101000011000111

w=16

1111011101111011111  
111011011000110100001101111  
1101101011000001001010110001111  
110111000001110001000101000111011  
1111010010100010001100000101100111  
11110001100100010100000110010010111  
11100010011010001001001001010010111  
11011001100001000010101001000101111

w=17

111110111101110111111  
11011011100010100100110101111  
1110111000100010010010001100101111  
111010100101001000100110000100111011  
1100110100011100000010101000011010111  
11011010000001010110010000011000110111  
11110100011000011000010010010001011011  
11110001100100000101000010101001001111

w=18

11111011110111011011111  
1101110110000101011000011101111  
111110001001010010100010100100110111  
11010101100100001000110000101100101111  
111010110010110000000101100010011000111  
1101110000101000101000100110001010010111  
1111000010001001100100100000110101001111  
1110011010100001110000001100000010111011

w=19

11110111101101110111111  
1110111010010001110010010111111  
11111010010010001010100111000101111  
1111001010100011001000011000111010111  
11101100001101100001000010110101101011  
111010110000011001001101010000011001111  
111101001110000100001101000101010001111  
111100010011010010101000001100100110111

w=20

1111101110110111101111111  
111011110001011011000010101110111  
1111011010011000100010101011010001111  
111011100010101000011001100001011010111  
1111100010100011010010000110100010011111  
11110100011000100110000110100010011100111  
11100101101001001001010100001110000111011  
11110010010111000001010000101001101001111

---

**N=70, k=16**

---

w=7

11110111  
110100000110101  
1110000100010000101  
10010100010100000011  
110000010100000100011  
110001001000000010101  
101100000010001000011  
101001000100001001001  
1100001000000100010011  
1010000010001001000011  
1010001000010000000111  
1000100100100000100011  
1001000100000100010101  
1100100000011000001001  
1010010000100000011001  
1011000000000100101001

w=8

1111010111  
111010000001001101  
1110000010100000100101  
10010001000010010000111  
10100010001000010010011  
110010010000001000100011  
110000100100000010100101  
110000101001000000011001  
101001000010000010001011  
1100001010000100001000101  
1100010000001010000001101  
1000110000100000001011001  
1001000100010010000110001  
1100100000100000010100011  
1101000000001100000010011  
1010100001000001000001011

w=9

11110110111  
1111000100000110101  
11000101000000011001011  
1100100010010000100000111  
11000110000100010000001011  
10110100000001000100001101  
11001000001001000100100011  
10100010010000100101000011  
101001010010000001000100011  
110001010000001000001000111  
111000000101010000001001001  
110100000100100000010100011  
101010100010000100000001011  
100011001000010010000010011  
111000001000100100100000101  
100110000100000011000010101

w=10

1111010110111  
11010010010010001111  
101101000010001100001011  
1100100110001000000101011  
11101000100000101001000011  
11100110000001001001000101  
11000101001000000110010101  
11000001001100001000101011  
100101000101000100000100111  
101001100010000000101000111  
1010100000010010001000011101  
110101000000101000010010011  
110010010100001000100001011  
111000010000010100000110011  
110110000001010001001000011  
111000000100100010001001101

w=11

1110110111111  
11101100000011010111  
110101000100010010001111  
1110100001010010001100101  
11100000110001001000011011  
11001010010000011010100101  
11010010100100010000011011  
11100001000010110001000111  
110011000001010000100100111  
101100010011000000001110011  
101011001010000010001001011  
101001100100001100001010101  
110010010010001010100000111  
110100110000010001010010011  
110101000100101000001000111  
111000100001100001001001101

w=12

11110111011111  
111010100100101100111  
1011001101001000000011111  
10111001000000110100101011  
111000010011000100010110011  
110100010100100010100001111  
111000100011000001100101011  
101101001100000101010100011  
1110101000001001100001001101  
1110010001000110100010010101  
1100011010001010100000100111  
1110010011000100001001001011  
1101010100100000110001001011  
1110000100100010000110011011  
1101100001010010000101010011  
1101101000010100010010000111

w=13

111111011101111  
1111011000001010110111  
11100010110000100110100111  
110110010000101110001010011  
1011010100010011000010101011  
1101011000100001100100100111  
1110100010100001001000111011  
1110001001001101000011000111  
11101010010010000011100010011  
10111000011001000010010101011  
11010100101000001000110010111  
11100100001010100100001101011  
11010001000110010100001011011  
10100110100101000010001001111  
11001101000001100010100100111  
11001011100000101010000011011

w=14

1111101111011111  
11111100010010101011011  
110111010000010100110101011  
1110001001110010010010010111  
11011100100100000100101010111  
10110010100010110010001100111  
11100101010000110011000011011  
11101010011000010101010000111  
101010100011010001100000110111  
111001000100110101000010011011  
110011001011000100000101101011  
110100110000110001001100100111  
111100001110001000101001100011  
110101100010001000010110010111  
111010010100100011100000101011  
110100100101010010000111001011

w=15

111110110111101111  
1111011010001100011011011  
1101010010100011011000101011  
111001011100000101000100111011  
1110100010001100101010010010111  
1110010010110000000111010011011  
1101110100010000101000111001011  
1110110000100101100001100101011  
11011010010001010001100100001111  
11010100001101000011010001101011  
11100101000101100100100001001111  
11010001110010001001010101000111  
11101001000110010010001011100011  
11011000101010100100001100010111  
11001111000010010100010000111011  
11100110011000010001001010100111

w=16

1111111011011101111  
1101101100001100101010110111  
111100010101000101001000111001011  
1110010010100100000111000001111011  
110101101000001100010110000100010111  
110101011000100101001001001000001111  
110110001000111000100000110001011011  
101100011100010010001010011000100111  
1101010100100000101110000010010110011  
1101010001010001100000010101001101011  
1110001110011000000001000110100101011  
1111010010100000011001100100100010101  
1101011001001100000001001010101000111  
1101100100010010101000100001101000111  
1110001100100010011000010000011001111  
1111000001001010010100001001100011011

w=17

111101110111101011111  
111001110100011001001001011111  
1110100100110000010100111001100111  
111001001011001000011100000101110011  
1100111000101000100011010000101001111  
1111100000010100110000010001011010111  
1011010101100001001000011010100011011  
1110011010100100100010100100010011011  
10110100101110000000101000111010010011  
11100100110011010000010100100010101101  
11010101001011100001000100010001101011  
11111000010001011000110010011000001011  
11100100110000001011010100000101010111  
11101011001000110001000001000011010111  
11010110000100010110001001010000011111  
11011001010010000100001011100100100111

w=18

111110111011110111111  
111111010000110010010101111011  
11011010100110000101010100100110111  
1110100010011010100100101000111000111  
11101100111000010000110001101100001011  
11011100001010100011011000001001110011  
11110010010101001000100010101010011011  
11110001100100100010011100000011011011  
110011100100010001100101100010010001111  
110100011010010011010000100101010001111  
101100111000100101000110010011001000111  
111010010011000101000000111000110101011  
110101010100001101000100001100101011101  
110101100001110000110000010100100101111  
111010110100000010110100000100001110111  
111100001011001010000001001110001101011

w=19

1111110111111011101111  
1111100101001101010010011110111  
110111011000100001110001010100101111  
11101100101100010000011110000011011101  
110110101000011010001010010001100111011  
111010110000101010000100110011010100111  
1111000101010100001100011000101000101111  
101111000011000011100100010100101001111  
1101011110010000001001010100110100010111  
1101100101100100001011001011000110001011  
1101101000110011100100010001010010100111  
1110001001010101010001001000011110001111  
1101010010001011010001101001000011011011  
1111000110001001100101000011000101010111  
1110100101100100011100000100100100110111  
1110011010110100000010010111000001101011

w=20

11111101111101111011111  
111110111100011001010100100111111  
1111000101101010010000011011001011111  
111010110010010010011000101010011100111  
1111110000010100100011010100001011011011  
1110010011001000111100001001100101010111  
1101001111000100011010100100001100110111  
1100111010110000000101101100011100010111  
11011001010100010100011100011001000101111  
11100110001000111000000111010001010110111  
11101010100001111001001000010100111001011  
11110010100101100100010010101100000110111  
11011010000110101010000100000111101100111  
11010101100010011000110010100110100101011  
11110101011000001010001011100100011000111  
11011000111011000001100001101010010011011
